# Supplementary material
Source: PubMed Central journal article supplement (PMC6755815)
Supplement: supp_RA119.009002_145064_2_supp_368940_pv7nss.pdf [file supp_RA119.009002_145064_2_supp_368940_pv7nss.pdf]

# A UCSC Genome Browser on Human **PLPP3** (GRCh37/hg19) Assembly

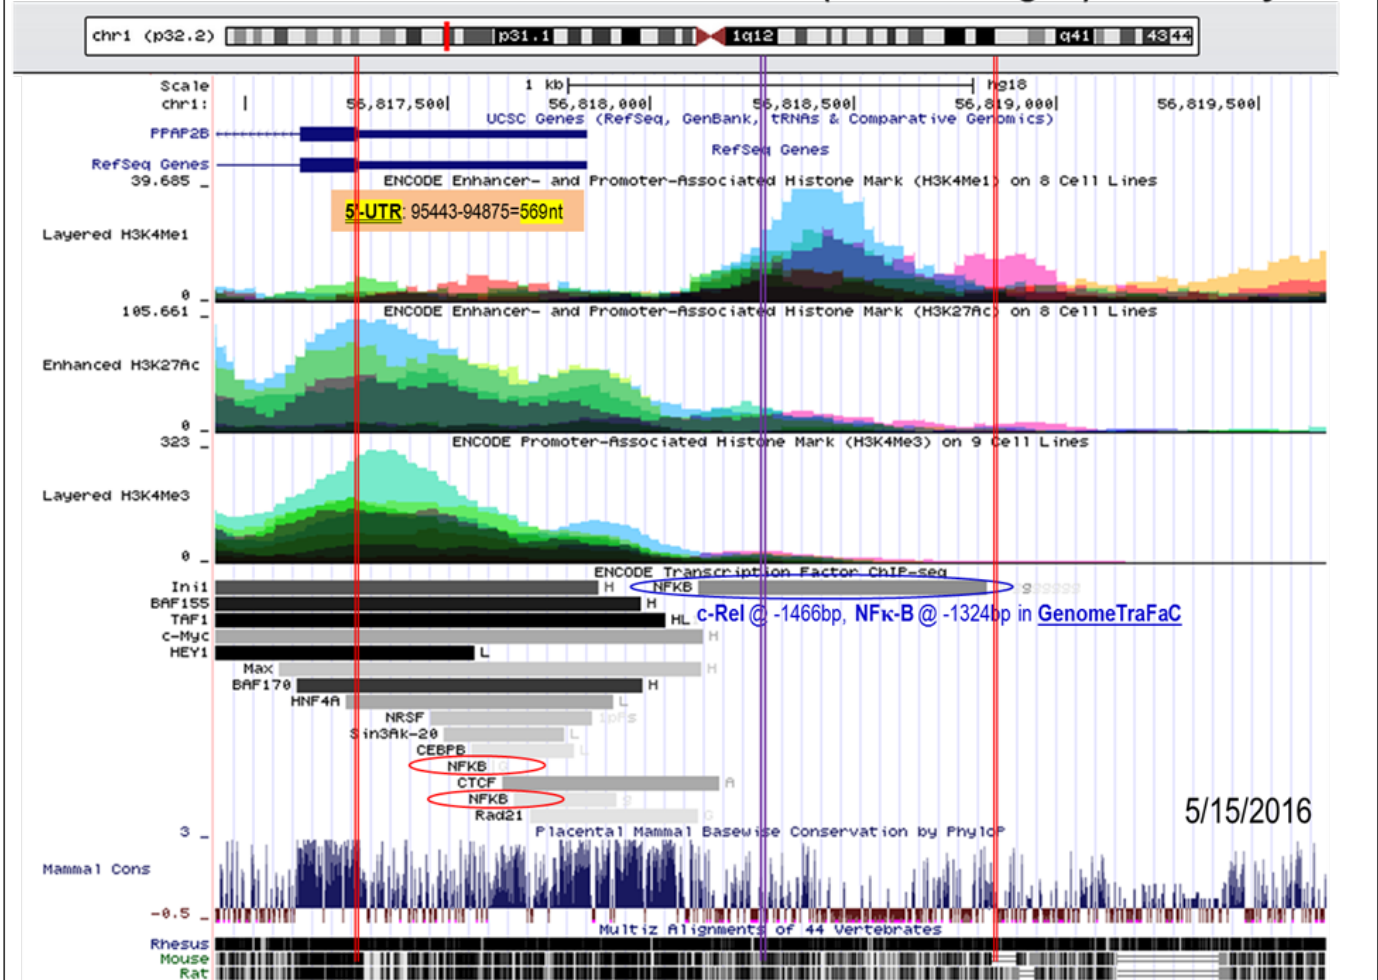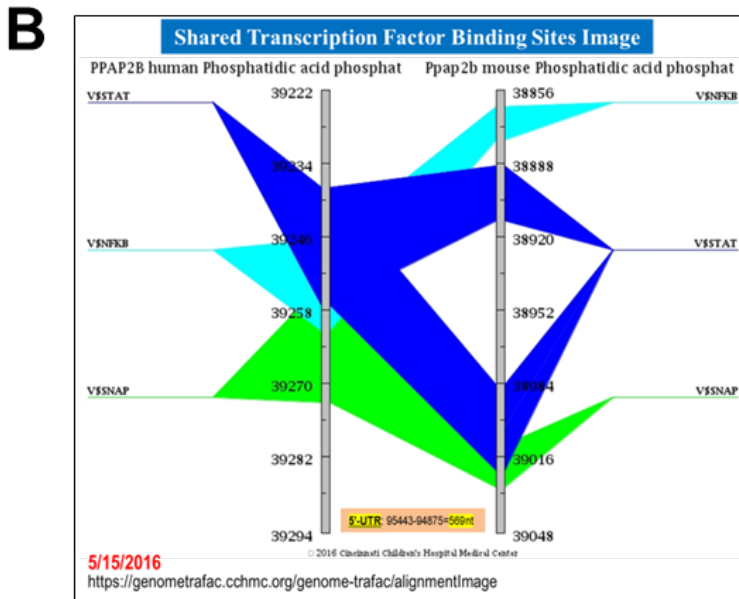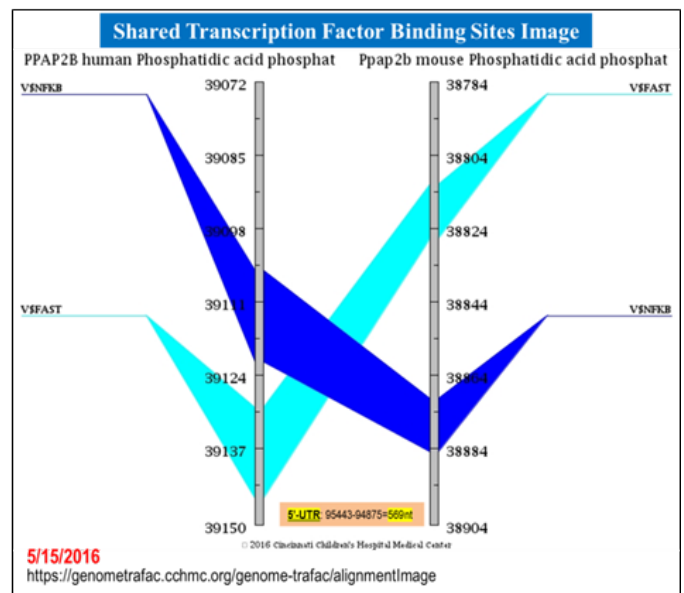

C

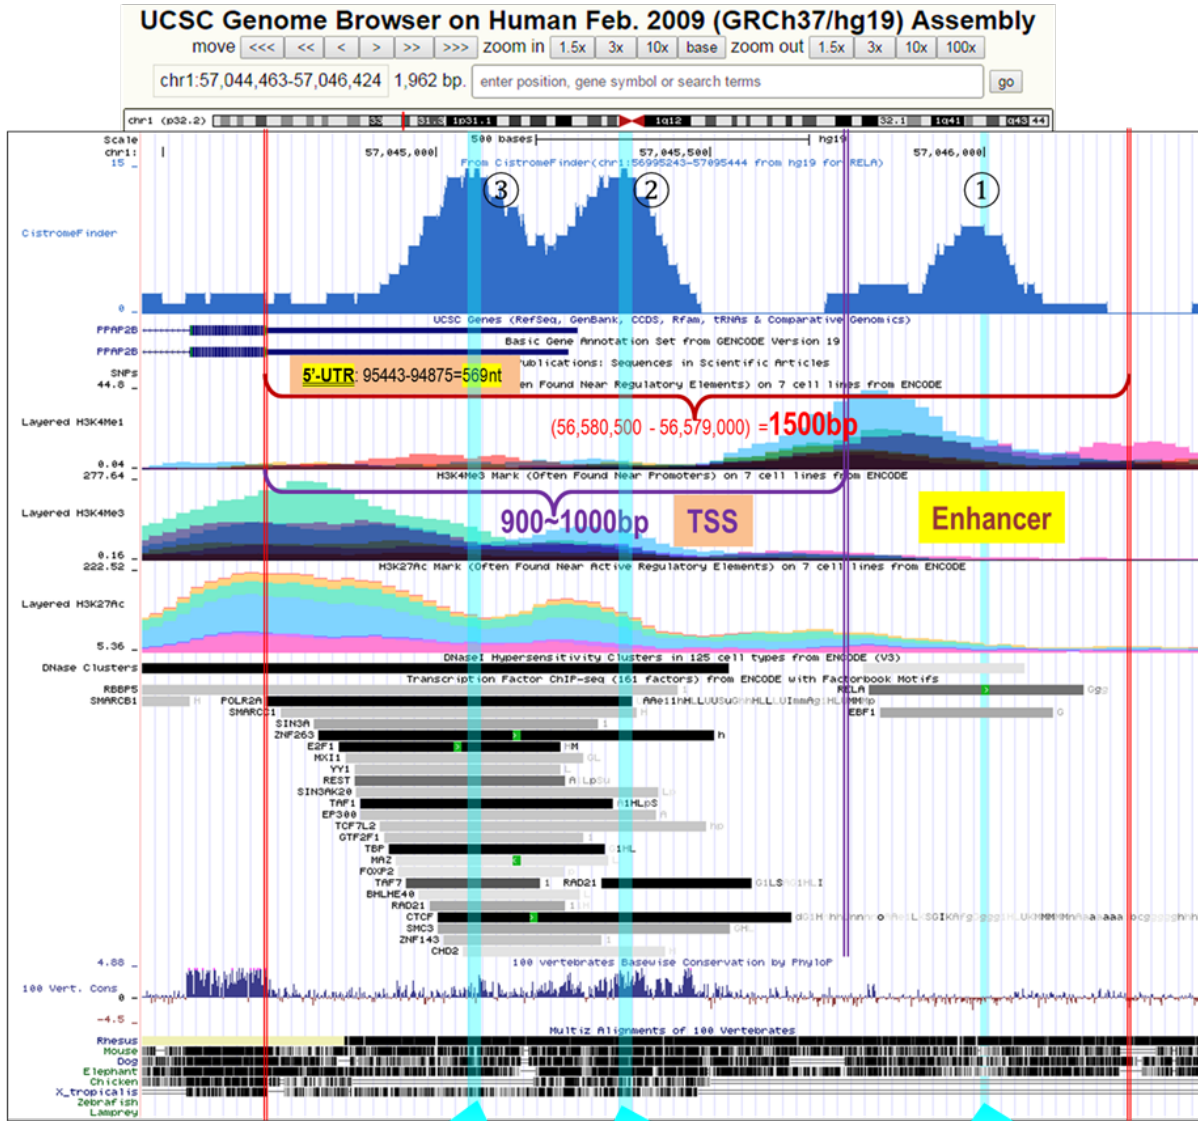

D

|              | ③ ReRE        | ② ReRE          | ① ReRE           |
|--------------|---------------|-----------------|------------------|
| Human        | GATGGGATTCGA  | CCGGGAGCCCCTAGC | TATGGGGAATTCCAGG |
| Rhesus       | GATGGGATTCGA  | CCGGGAGCCCCTAGC | TATGGGGAATTCCAGG |
| Mouse        | AACAAGATTCAGA | CAGGGAGCCCCTAGC | -----            |
| Dog          | GAGGAGATCCGA  | CCGGGAGCCCCTAGC | CATGGGGGGGTCCAGC |
| Elephant     | GATGGGATTCGA  | CCGGGAGCCCCTAGC | =====TCC         |
| Chicken      | GATGGGATATCCA | GAAGGAGCCTCTAGC | =====            |
| X_tropicalis | CATGGGATTTCC- | GAGAGAGCCCCTAGC | =====            |


**Web Portal to Explore ChIP-seq and DNase-seq Data**  
 @ <http://cistrome.org/ap/root>

**Supplemental Figure 1. Functional genomic analysis of regulatory elements in the human PLPP3 promoter.** Data visualization and analysis tools available online at the Cistrome Project (<http://cistrome.org/>), the University of California at Santa Cruz (UCSC) genome browser (<https://genome.ucsc.edu/>) and the Genome TraFaC database (<https://genometrafac.cchmc.org/genometrafac/index.jsp>) were used to prepare this figure. **A. Structural analysis of the PLPP gene at low resolution.** The figure shows the region of chromosome 1 containing the PLPP3 gene identified in red in the upper panel expanded to show regions of active chromatin identified by histone methylation and acetylation marks and interactions with the series of transcription factors identified in the figure using chromatin immunoprecipitation analysis. The presence of binding sites for NF- $\kappa$ B transcription factors are circled in red. The lower panel of the figure shows sequence conservation of the PLPP3 promoter between the indicated mammalian species. **B. Conservation of transcription factor binding sites in the mouse and human PLPP3 promoter.** The figure shows two regions of the PLPP3 promoter with the human sequence on the left and the mouse sequence on the right with conserved sequences for the indicated transcription factors identified by the colored insets. The binding sites for NF- $\kappa$ B transcription factors identified in the human PLPP3 promoter are shown in light blue and these are conserved between the human and mouse genes. **C. Structural analysis of the PLPP3 promoter at higher resolution.** The information in panel A is presented at higher resolution. The upper panel shows the three NF- $\kappa$ B binding sites numbered 1, 2 and 3 identified by chromatin immunoprecipitation analysis in blue with histone methylation and acetylation marks and binding sites for additional transcription factors determined by chromatin immunoprecipitation sequencing shown below. The lower part of the figure shows conservation of sequences in the PLPP3 promoter between multiple vertebrate species. **D. Sequence alignment of putative NF- $\kappa$ B target sequences (Rel responsive elements, denoted ReRE) in the PLPP3 promoter from the indicated vertebrate species.** The figure shows an alignment of the cognate sequences in the PLPP3 promoter from the indicated species with the three Rel responsive sequence elements boxed. Two of these sequence elements are highly conserved among all of the vertebrate species analysed while the first sequence element was only identified in the human and rhesus monkey PLPP3 promoter.

**The NF $\kappa$ B(RelA/RelB) Responsive Element (ReRE) in PPAP2B promoter/enhancer(~1500nt)**

|      |                                                                                                                                                     |
|------|-----------------------------------------------------------------------------------------------------------------------------------------------------|
| 1    | <u>CACTGTGCCC</u> <u>AGGTCCATGC</u> <u>TAGGCACTAT</u> <u>AGAAGATACA</u> <b>AGGGAAGGCC</b> <b>CTTGCCCTGG</b> <u>AAATGTTTAT</u><br>(1500-bp promoter) |
| 71   | TCTCTATCTG GAAAAAAGAT TAACTCACAT AAAATAATTA AAAATAAGAT GCCAGCCTCT AAGGAAAAAT                                                                        |
| 141  | GTTAGATTGT CTGAAACTCA AGCAGAGAGC ATTTTGCTG <b>CCCTGGAATCCCCA</b> TAGTA GTAGAATTAC<br>① <b>ACCTTAAGGGGT</b> -5'<br>                                  |
| 211  | TCTTGGGGCC AAGAGAGGGG TTGCCTGAGA CTCCTTACC CAGAAAAAAG GTAATTGCTA ACCCTCACAG                                                                         |
| 281  | AGCACTTCCT ATGTACTGGG CACTGTTCTA GGAGCTTATA CGGATTAACA AATTAAGTCT TCACAACCAC                                                                        |
| 351  | CCTATATGAA AAGGAACAGT TATCTCTAGT TACATACGGG GAAACTGAGG CACAGAGTCA CAGGATTGAA                                                                        |
| 421  | ATCCAGGAGA TGTGGTTCCA CAGTCGTGCA GTCTTTTTCA TTTTAGTATT CTCAAAAATCT <u>AGCGTAGTAC</u><br>(1000-bp promoter)                                          |
| 491  | <u>CCGGTGTGG</u> <u>ATGTTAAGAT</u> <u>CTTAAACAAA</u> CAAACAACCT GTTTTCTTAA AAAATTATAT TTTCAGGGTA                                                    |
| 561  | ATACAATTCA AGTCACAATA AAGACCTGAA AGCCTCAGGT TTGTAGGTGA GGAAAAATGC ATTTTAGCTG                                                                        |
| 631  | TACAGCCCTA ACTTTTACTT GACCCAAGGC CAGCAAGAA ATGTTTCTTT TTATTATAT ATATTTTTTC                                                                          |
| 701  | TTTGGTGACA ATTTGGTGTT TCTGAACGCT <b>AGGGGCTCCC</b> GGTTCCTCTG GTTTGAGAGT AACTTTTCCT                                                                 |
| 771  | TTTAGGACTT TTTTTTTTTT TTTTGAAGGG GGTGGGGGAA AATGTGGCCT TAATTATCCT ACGTCTTAGG<br>② <b>AGGGGATTCCG</b>                                                |
| 841  | CAGCTTAAGG AAGGGGCTGT GCTTTC <b>GGAAATCCCA</b> TCCGA GCCAAGTAAG GAGGTCCCTC TCTCTCTCTC<br>③ <b>AGGGGATTCCG</b>                                       |
| 911  | CCCCACGTC TTCTCTTTTT AAAGGACCTC GTGAAATAAA AGTGCAGAAA ACAAAACCAG GCGATCACAG                                                                         |
| 981  | CAGCAGCCGC CGCGGCAGCA GCACCAACAG CAGGAGGAGC AGGAGGAGCC GGAGGAGGAG GAGGAGGAGG                                                                        |
| 1051 | AGGCAAAGTT AGAGTTGGGG CTGGCGCTCC GGAGTTGCTG GGCTCAGCGC AGCTCCCAT CATTAGGAA                                                                          |
| 1121 | CCAGCTGCGG AGGAAGGTGG CCGAGCGCCC GCGCTGCCCC CTCGCTCGCT CGCGCACTCA GACGCGCGCC                                                                        |
| 1191 | ACAAACAGCGC GCCCCAAGCT GCGCAGCTCT GCAAAAGTTT CTGCTCGGGA TCTGGCTCTC TTCCCCTTGG                                                                       |
| 1261 | ACTTTAGAAC GATTTAGGGT TGACAGAGGA AAGCAGAGGC GCGCAGGAGG AGCAGAAAAC ACCACCTTCT                                                                        |
| 1331 | GCAGTTGGAG GCAGGCAGCC CCGGCTGCAC TCTAGCCGCC GCGCCCGGAG CCGGGGCCGA CCCGCCACTA                                                                        |
| 1401 | TCCGCAGCAG CCTCGGCCAG GAGGCGACCC GGGCGCCTGG GTGTGTGGCT GCTGTTGCGG GACGTCTTCG                                                                        |
| 1471 | CGGGCGGGGA GGCTCGCGCC GCAGCCAGCG <b>CCATG</b>                                                                                                       |

**Supplemental Figure 2. Sequence of the entire human PLPP3 promoter identifying Rel Responsive element sequences.** The figure shows the sequence of the coding strand of the entire PLPP3 promoter identified by our functional genomic analysis upstream of the ATG initiation codon. The three Rel Responsive sequence elements are shown in color in alignment with the consensus boxed. The non coding strand sequence is shown for response element 1.

## Supplemental Table S1. Oligonucleotides used in the study

| Oligos                                           | Sequence                                          |
|--------------------------------------------------|---------------------------------------------------|
| <b>Chip assay</b>                                |                                                   |
| ChIPReRE1-F                                      | 5'-TAAGATGCCAGCCTCTAAGGAA-3'                      |
| ChIPReRE1-R                                      | 5'-TTTCTGGGTGAAGGAGTCTCAG-3'                      |
| ChIPReRE2-F                                      | 5'-GACCCAAGGCCAGCAAGAAAAT-3'                      |
| ChIPReRE2-R                                      | 5'-GACGTAGGATAATTAAGGCCAC-3'                      |
| ChIPReRE3-F                                      | 5'-GTGGCCTTAATTATCCTACGTC-3'                      |
| ChIPReRE3-R                                      | 5'-GCACTTTTATTTACAGAGGTCC-3'                      |
| <b>ReRE mutagenesis</b>                          |                                                   |
| MutReRE1-F                                       | 5'-GCATTTTGGCTGCCCTaGcActaCtCATAGTAGTAGAATTAC-3'  |
| MutReRE1-R                                       | 5'-GTAATTCTACTACTATGAGTAGTGCTAGGGCAGCCAAAATGC-3'  |
| MutReRE2-F                                       | 5'-GTGTTTCTGAACGCtcGtGaCaCgCggTTTTCTCTGGTTTGA-3'  |
| MutReRE2-G                                       | 5'-TCAAACCAGAGAAAACCGCGTGTACGAGCGTTCAGAAACAC-3'   |
| MutReRE3-F:                                      | 5'-AAGGGGCTGTGCTTTCGtcAqCaCATCCGAGCCAAGTAAGGA-3'  |
| MutReRE3-R:                                      | 5'-TCCTTACTTGGCTCGGATGTGCTGACGAAAGCACAGCCCCTT-3   |
| ReRE23seq-F                                      | 5'-CCGGTGTGGATGTTAAGATC-3'                        |
| <b>PLPP3 promoter/enhancer cloning</b>           |                                                   |
| PPAP2Bpro17-F                                    | 5'-TATACTCGAGgagcaggggtgtggagtgtgaaaggattgtacc-3' |
| PPAP2Bpro15-F                                    | 5'-TATACTCGAGgtccactgtgccaggtccatgctaggcactata-3' |
| PPAP2Bpro-R                                      | 5'-TATATAAGCTTggcgctggctgcggcgcgagcctcccggcg-3'   |
| P2Bpro11k-F2S                                    | 5'-atccaggagatgtggttccacagtcgtgcagt-3'            |
| P2Bpro10k-F2S                                    | 5'-gcgtagtacccgggtgttggatgttaagatc-3'             |
| P2Bpro10k-R2S                                    | 5'-GATCTTAACATCCAACACCGGGTACTACGC-3'              |
| <b>PLPP3 mRNA reverse transcription (RT)-PCR</b> |                                                   |
| PLPP3qRte4-F                                     | 5'-GCATAGTGATCATGGAGAAGGAGG-3'                    |
| PLPP3qRte3-R                                     | 5'-GTGGCAGCACTCTATAAGCAAGTG-3'                    |

**Supplemental Table 1.** The table shows the sequence of oligonucleotides used in this assay as probes or as primers for mutagenesis or cloning of PLPP3 genomic DNA or cDNA
